# Supplementary material for: The general practitioners perspective regarding registration of persistent somatic symptoms in primary care: a survey
Source: Springer Nature journal article supplement (doi:10.1186/s12875-021-01525-6), 2021-09-11
Supplement: MOESM2 [file 19655682]

## Overview of items, ICD codes and categorization

| ICPC   | Name                                     | Type of complaint |       |                     |         | Category         |
|--------|------------------------------------------|-------------------|-------|---------------------|---------|------------------|
|        |                                          | Neck & back       | Bowel | Shortness of breath | Fatigue |                  |
| A01    | Pain general/multiple sites              | X                 | X     |                     |         | General          |
| A04    | Weakness/tiredness general               |                   |       | X                   | X       | Symptom-specific |
| A04.01 | Chronic fatigue syndrome                 |                   |       | X                   | X       | Syndrome         |
| A28    | Limited function/disability NOS          | X                 | X     | X                   | X       | General          |
| A97    | No disease                               | X                 | X     | X                   | X       | General          |
| A99    | General disease NOS                      | X                 | X     | X                   | X       | General          |
| D01    | Abdominal pain/cramps general            |                   | X     |                     |         | Symptom-specific |
| D02    | Abdominal pain epigastric                |                   | X     |                     |         | Symptom-specific |
| D06    | Abdominal pain localized other           |                   | X     |                     |         | Symptom-specific |
| D20    | Mouth/tongue/lip symptom/complaint       |                   |       | X                   |         | Symptom-specific |
| D28    | Limited function/disability (d)          |                   | X     |                     |         | General          |
| D29    | Digestive symptom/complaint other        |                   | X     |                     |         | General          |
| D93    | Irritable bowel syndrome                 |                   | X     |                     |         | Syndrome         |
| K02    | Pressure/tightness of heart              |                   |       | X                   |         | Symptom-specific |
| K03    | Cardiovascular pain NOS                  |                   |       | X                   |         | General          |
| K04    | Palpitations/awareness of heart          |                   |       | X                   |         | Symptom-specific |
| K05    | Irregular heartbeat other                |                   |       | X                   |         | Symptom-specific |
| L01    | Neck symptom/complaint                   | X                 |       |                     |         | Symptom-specific |
| L02    | Back symptom/complaint                   | X                 |       |                     |         | Symptom-specific |
| L03    | Low back symptom/complaint               | X                 |       |                     |         | Symptom-specific |
| L18    | Muscle pain                              | X                 |       |                     |         | Symptom-specific |
| L18.01 | Fibromyalgia                             | X                 |       |                     |         | Syndrome         |
| L27    | Fear musculoskeletal disease other       | X                 |       |                     |         | General          |
| L28    | Limited function/disability (l)          | X                 |       |                     |         | General          |
| L29    | Sympt./complaint musculoskeletal other   | X                 |       |                     |         | General          |
| L79    | Sprain/strain of joint NOS               | X                 |       |                     |         | Symptom-specific |
| L79.01 | Whiplash trauma cervical spine           | X                 |       |                     |         | Symptom-specific |
| L83    | Neck syndrome                            | X                 |       |                     |         | Symptom-specific |
| L86    | Back syndrome with radiating pain        | X                 |       |                     |         | Symptom-specific |
| L86.01 | Spinal disc herniation (thoracic/lumbar) | X                 |       |                     |         | Symptom-specific |
| N01    | Headache                                 | X                 |       |                     |         | Symptom-specific |
| N28    | Limited function/disability (n)          | X                 | X     |                     |         | General          |
| N29    | Neurological symptom/complaint other     | X                 | X     | X                   |         | General          |
| P28    | Limited function/disability (p)          | X                 | X     | X                   | X       | General          |
| P29    | Psychological symptom/complaint other    | X                 | X     | X                   | X       | General          |
| P75    | Somatization disorder                    | X                 | X     | X                   | X       | Somatization     |
| P99    | Psychological disorders, other           | X                 | X     | X                   | X       | General          |
| R01    | Pain respiratory system                  |                   |       | X                   |         | Symptom-specific |
| R02    | Shortness of breath/dyspnoea             |                   |       | X                   |         | Symptom-specific |
| R04    | Breathing problem, other                 |                   |       | X                   |         | General          |
| R28    | Limited function/disability (r)          |                   |       | x                   |         | General          |
| U13    | Bladder symptom/complaint other          |                   | X     |                     |         | General          |
| U28    | Limited function/disability urinary      |                   | X     |                     |         | General          |
